1 Butyrate differentiates permissiveness to *Clostridioides difficile* infection and  
2 influences growth of diverse *C. difficile* isolates.

3

4 Daniel A. Pensinger<sup>1,2</sup>, Andrea T. Fisher<sup>3</sup>, Horia A. Dobrila<sup>1,2,5</sup>, William Van  
5 Treuren<sup>3,\*6</sup>, Jackson O. Gardner<sup>3,\*4</sup>, Steven K. Higginbottom<sup>3</sup>, Matthew M.  
6 Carter<sup>3</sup>, Benjamin Schumann<sup>7,\*8</sup>, Carolyn R. Bertozzi<sup>7,9</sup>, Victoria Anikst<sup>10,\*11</sup>,  
7 Cody Martin<sup>5,12</sup>, Elizabeth V. Robilotti<sup>13,\*14</sup>, JoMay Chow<sup>15</sup>, Rachael H. Buck<sup>15</sup>,  
8 Lucy S. Tompkins<sup>13</sup>, Justin L. Sonnenburg<sup>3,16</sup>, Andrew J. Hryckowian<sup>\*1,\*2,3,17</sup>

9

10 <sup>1</sup> Department of Medicine, Division of Gastroenterology and Hepatology,  
11 University of Wisconsin School of Medicine and Public Health, Madison, WI, USA

12 <sup>2</sup> Department of Medical Microbiology & Immunology, University of Wisconsin  
13 School of Medicine and Public Health, Madison, WI, USA

14 <sup>3</sup> Department of Microbiology & Immunology, Stanford University School of  
15 Medicine, Stanford, CA, USA

16 <sup>4</sup> Department of Biomedical Sciences, University of California, San Francisco,  
17 San Francisco, CA, USA

18 <sup>5</sup> Microbiology Doctoral Training Program, University of Wisconsin-Madison,  
19 Madison, WI, USA

20 <sup>6</sup> Interface Biosciences Inc, Palo Alto, CA, USA

21 <sup>7</sup> Department of Chemistry, Stanford University, Stanford, CA, USA

22 <sup>8</sup> Chemical Glycobiology Laboratory, Francis Crick Institute and Department of  
23 Chemistry, Imperial College London, London, England

24 <sup>9</sup> Howard Hughes Medical Institute, Stanford University, Stanford, CA, USA

25 <sup>10</sup> Department of Pathology, Stanford University School of Medicine, Stanford,  
26 CA, USA

27 <sup>11</sup> Department of Pathology and Laboratory Medicine, University of California,  
28 Los Angeles, Los Angeles, CA, USA

29 <sup>12</sup> Department of Bacteriology, University of Wisconsin-Madison, Madison, WI,  
30 USA

31 <sup>13</sup> Department of Medicine, Division of Infectious Disease, Stanford University  
32 School of Medicine, Stanford, CA, USA

33 <sup>14</sup> Memorial Sloan Kettering Cancer Center, New York, NY, USA

34 <sup>15</sup> Abbott, Nutrition Division, Columbus, OH, USA

35 <sup>16</sup> Chan Zuckerberg BioHub, San Francisco, CA, USA

36 <sup>17</sup> Corresponding author

37 \* Current affiliation

38

39 **ABSTRACT**

40 A disrupted “dysbiotic” gut microbiome engenders susceptibility to the diarrheal  
41 pathogen *Clostridioides difficile* by impacting the metabolic milieu of the gut. Diet,  
42 in particular the microbiota accessible carbohydrates (MACs) found in dietary  
43 fiber, is one of the most powerful ways to affect the composition and metabolic  
44 output of the gut microbiome. As such, diet is a powerful tool for understanding  
45 the biology of *C. difficile* and for developing alternative approaches for coping  
46 with this pathogen. One prominent class of metabolites produced by the gut

47 microbiome are short chain fatty acids (SCFAs), the major metabolic end  
48 products of MAC metabolism. SCFAs are known decrease the fitness of *C.*  
49 *difficile* in vitro and that high intestinal SCFA concentrations are associated with  
50 reduced fitness of *C. difficile* in animal models of *C. difficile* infection (CDI). Here,  
51 we use controlled dietary conditions (8 diets that differ only by MAC composition)  
52 to show that *C. difficile* fitness is most consistently impacted by butyrate, rather  
53 than the other two prominent SCFAs (acetate and propionate), during murine  
54 model CDI. We similarly show that butyrate concentrations are lower in fecal  
55 samples from humans with CDI relative to healthy controls. Finally, we  
56 demonstrate that butyrate impacts growth in diverse *C. difficile* isolates. These  
57 findings provide a foundation for future work which will dissect how butyrate  
58 directly impacts *C. difficile* fitness and will lead to the development of diverse  
59 approaches distinct from antibiotics or fecal transplant, such as dietary  
60 interventions, for mitigating CDI in at-risk human populations.

61

## 62 **IMPORTANCE**

63 *Clostridioides difficile* is a leading cause of infectious diarrhea in humans and it  
64 imposes a tremendous burden on the healthcare system. Current treatments for  
65 *C. difficile* infection (CDI) include antibiotics and fecal microbiota transplant,  
66 which contribute to recurrent CDIs and face major regulatory hurdles,  
67 respectively. Therefore, there is an ongoing need to develop new ways to cope  
68 with CDI. Notably, a disrupted “dysbiotic” gut microbiota is the primary risk factor  
69 for CDI but we incompletely understand how a healthy microbiota resists CDI.

70 Here, we show that a specific molecule produced by the gut microbiota, butyrate,  
71 is negatively associated with *C. difficile* burdens in humans and in a mouse  
72 model of CDI and that butyrate impedes the growth of diverse *C. difficile* strains  
73 in pure culture. These findings help to build a foundation for designing  
74 alternative, possibly diet-based, strategies for mitigating CDI in humans.

75

## 76 **INTRODUCTION**

77 *Clostridioides difficile* is an opportunistic diarrheal pathogen and is an  
78 “urgent threat” to global health, as it causes over 220,000 cases and 13,000  
79 deaths per year in the United States alone [1]. A disrupted (dysbiotic) gut  
80 microbiome, most commonly resulting from antibiotic use, is the primary risk  
81 factor for *C. difficile* infection (CDI) [2], highlighting the gut microbiome as a key  
82 mediator of CDI. Therefore, measures to positively impact the composition and  
83 function of the gut microbiome represent potential approaches to understand and  
84 mitigate *C. difficile* pathogenesis.

85 Diet is one of the most powerful ways to impact the composition and  
86 function of the gut microbiome [3,4]. A growing body of literature demonstrates  
87 that dietary changes impact *C. difficile*, the microbiome, and the host during  
88 animal models of CDI. For example, low protein diets are protective against CDI  
89 and high fat/high protein diets exacerbate CDI [5,6] and availability of the amino  
90 acid proline in particular impacts *C. difficile* fitness in murine models [7]. Diets  
91 containing inulin, xanthan gum, and complex mixtures of microbiota accessible  
92 carbohydrates (MACs) reduce *C. difficile* burdens below detection in mice [8,9]

93 and fructooligosaccharides (FOS) increase survival in infected hamsters [10].  
94 Another carbohydrate, trehalose, increases CDI mortality in mice [11] but does  
95 not impact *C. difficile* burdens or virulence in chemostats containing human-  
96 derived microbiomes [12], together highlighting the need to understand how diet  
97 influences both host- and microbiome-driven factors that impact CDI outcomes.  
98 Finally, the abundance of metals such as zinc also correlate with several  
99 measures of CDI severity in mice [13]. Together, these studies support that  
100 microbiome- and host-dependent metabolite availability in the gut, rather than a  
101 specific “susceptible” or “resistant” microbiome configuration, defines colonization  
102 resistance against *C. difficile* [8,14–16]. Furthermore, each of the aforementioned  
103 diet-driven impacts on CDI represents an opportunity to understand the diverse  
104 metabolic requirements of, and niches occupied by, *C. difficile* during CDI and  
105 are likely to lead to the development of new concepts and approaches for  
106 mitigating CDI in at-risk human populations. Notably, this previous work was  
107 carried out under controlled experimental conditions which were designed to  
108 specifically manipulate conditions of interest using animal models of CDI and a  
109 limited number of *C. difficile* strains. Therefore, though animal models of CDI  
110 recapitulate many relevant aspects of human disease, it is unclear the extent to  
111 which these findings translate to human populations who are infected by  
112 phylogenetically diverse *C. difficile* strains and who differ in important parameters  
113 like immune status and dietary habits.

114         Of the dietary inputs described above which impact CDI, MACs represent  
115 a particularly high-yield avenue for diet-focused work on *C. difficile*. In particular,

116 the short chain fatty acids (SCFAs), which are the metabolic end products of  
117 MAC metabolism by the microbiome [17], impact *C. difficile* fitness in pure culture  
118 and in animal models of infection [8,18,19] and have pleiotropic beneficial effects  
119 on the host [20–26]. Three SCFAs (acetate, propionate, and butyrate) are the  
120 most abundant metabolites in the gut, together reach concentrations of over  
121 100mM in the gastrointestinal tracts of humans [27], and are influenced by host  
122 MAC consumption. The dysbiotic conditions which favor CDI are characterized  
123 by low SCFA concentrations in both humans and animal models [8,11,15,28,29].

124 Despite the emerging understanding of the impact of dietary MACs and  
125 their metabolic end-products on CDI and the promise for rapid translation to  
126 humans, key questions remain. For example, which MACs are most effective in  
127 impacting CDI? What parameters differentiate effective MACs from ineffective  
128 MACs? What mechanism(s) underly these differences? Are these conclusions  
129 generalizable to all *C. difficile* strains? To begin to answer these questions, this  
130 study leverages a murine model of CDI, human samples, and a collection of *C.*  
131 *difficile* isolates to demonstrate that elevated concentrations of butyrate are  
132 associated with a reduction in *C. difficile* fitness in pure culture, in mice, and in  
133 humans. Together, these findings provide the foundation for future work aimed at  
134 understanding the metabolic interactions that dictate *C. difficile* fitness and  
135 pathogenesis and for developing new approaches to mitigate CDI in at-risk  
136 human populations.

137

138 **RESULTS**

139 ***Inulin and FOS differentially impact C. difficile burdens in mice***

140 In previous work, we demonstrated that inulin, a  $\beta$ -2,1-linked fructan,  
141 suppresses *C. difficile* burdens in a murine model of CDI [8]. To begin to test the  
142 generalizability of these findings to other purified MAC sources, we focused on  
143 FOS, which is structurally identical to inulin except for its degree of  
144 polymerization (DP) (FOS DP = 2-8 and inulin DP = 2-60) [30]. In contrast to  
145 mice fed inulin, mice fed FOS retain high burdens of *C. difficile* 630 during CDI  
146 (**Figure 1**). These results generated two possible hypotheses, that the effect of  
147 MAC sources on *C. difficile* burden is driven by either MAC effects on the  
148 microbiota or by direct effects on *C. difficile*.

149 To begin to understand the differential impacts of these two MAC types on  
150 CDI, we grew *C. difficile* 630 in minimal medium supplemented with FOS or  
151 inulin. *C. difficile* 630 grows to a higher density in minimal medium supplemented  
152 with FOS relative to minimal medium supplemented with inulin (**Figure 2A**). This  
153 and previous work demonstrate that *C. difficile* cannot use inulin for growth [31].  
154 However, *C. difficile* encodes an uncharacterized carbohydrate-active enzyme  
155 (CAZYme) that belongs to glycoside hydrolase family 32 (GH32), encoded by  
156 CD630\_18050 in *C. difficile* 630. GH32 CAZYmes are important for fructan  
157 hydrolysis and are highly specific for their substrates (e.g. inulin, FOS, levan,  
158 sucrose) [32]. Together, these observations led us to hypothesize that FOS does  
159 not suppress CDI because *C. difficile* metabolizes FOS via a FOS-specific GH32  
160 enzyme allowing it to persist during infection in mice fed FOS. To address this  
161 hypothesis, we performed high performance anion exchange chromatography

162 with pulsed amperometric detection (HPAEC-PAD) to determine the extent of  
163 FOS utilization by *C. difficile* grown in FOS-supplemented minimal medium. We  
164 determined that *C. difficile* does not utilize FOS but instead consumes the trace  
165 amounts of glucose and fructose in the FOS preparation (**Figure 2B**, peaks  
166 within gray bars correspond to glucose and fructose based on reference  
167 chromatograms in **Figure S1**). Therefore, this work supports previous findings  
168 that *C. difficile* does not readily consume MACs [31] and that it is likely that  
169 factors unrelated to FOS metabolism by *C. difficile* contribute to the inability of  
170 FOS to clear murine CDI.

171 The major metabolic end products of MAC metabolism by the gut  
172 microbiome are SCFAs, predominantly acetate, propionate, and butyrate  
173 [17,33,34]. Based on the metabolic capabilities of a given microbiome, MACs can  
174 differentially impact SCFA abundance and ratios in the gut. Our previous work  
175 and the work of others showed that SCFAs influence the fitness of *C. difficile* in  
176 animal models and in culture [8,19,28,35] and that FOS and inulin differentially  
177 impact the quantities and proportions of SCFAs produced by gut microbes in vitro  
178 [36]. We therefore hypothesized that FOS and inulin differentially impact CDI  
179 based on the quantities and types of SCFAs produced by the microbiome during  
180 infection. To address this hypothesis, we quantified acetate, propionate, and  
181 butyrate in the cecal contents of conventional mice fed FOS, inulin, or a MAC-  
182 deficient diet (see **Figure 1**) as described previously [8]. Mice fed FOS have  
183 lower levels of acetate, propionate, and butyrate in their ceca relative to those fed  
184 inulin (**Figure 2C**). In addition, less acetate was detected in the cecal contents of



185 FOS-fed mice relative to mice fed a MAC deficient diet (**Figure 2C**), suggesting  
186 that alternative metabolic end products, distinct from acetate, propionate, and  
187 butyrate, are produced by FOS-fed microbiomes in this model. Consistent with  
188 our previous work, these data suggest that MACs that favor a SCFA-enriched gut  
189 environment discourage CDI.

190

191 ***Cecal butyrate concentrations differentiate mice that do and do not***  
192 ***suppress CDI across diverse MAC types***

193 The conclusions that elevated SCFAs negatively impact *C. difficile*  
194 burdens in the mouse gut are based on experiments that used a limited number  
195 of dietary conditions. Specifically, both a complex MAC-rich diet (5010 Purina  
196 LabDiet) and a diet containing inulin as the sole MAC source suppress CDI. On  
197 the other hand, MAC deficient diets or a diet containing FOS as the sole MAC  
198 source do not clear CDI (see **Figure 1** and [8]). To further generalize these  
199 findings, we fed 5 additional diets containing different MAC sources to mice with  
200 experimental CDI. These diets contained one of three individual human milk  
201 oligosaccharides (HMOs; 2'-fucosyllactose (2'-FL), 6'-sialyllactose (6'-SL), lacto-  
202 N-neo-Tetraose (LNnT)), a digestion resistant maltodextrin, or a complex mixture  
203 of MACs found within gum arabic. These MACs were selected based on  
204 evidence that HMOs impact SCFA production by gut microbes [37] and have a  
205 variety of beneficial effects on the eukaryotic host [38] and to understand whether  
206 the SCFAs produced by other structurally unrelated plant polysaccharides  
207 (distinct from fructans or the complex mixture of MACs present in standard

208 rodent diets) impact *C. difficile* infection. We observed that these MAC types  
209 differentially impact *C. difficile* burdens and that out of these additional MACs  
210 tested, maltodextrin was the only one that consistently reduced *C. difficile*  
211 burdens below detection (**Figure 3A**). We then quantified acetate, propionate,  
212 and butyrate in the cecal contents of mice shown in **Figure 3A** to determine if  
213 SCFA concentrations differentiate mice with and without detectable fecal *C.*  
214 *difficile* in this cohort of mice fed inulin, gum arabic, resistant maltodextrin, 6'-SL,  
215 2'-FL, and LNnT (**Figure 3B**). This diet-agnostic analysis of SCFA levels  
216 demonstrates that mice that cleared *C. difficile* below detection have significantly  
217 elevated levels of butyrate (but not acetate or propionate) in their cecal contents  
218 relative to mice with detectable *C. difficile*.

219

### 220 ***Fecal butyrate concentrations differentiate stool samples from humans*** 221 ***with and without CDI***

222 After learning that butyrate concentrations differentiate mice with and  
223 without detectable *C. difficile* in their feces, we wanted to know if butyrate  
224 concentrations are similarly associated with CDI in humans. Though previous  
225 work showed that SCFA concentrations increase in stool from CDI patients after  
226 a fecal transplant [39], the differences in concentrations of SCFAs in humans  
227 with CDI versus healthy controls was not previously determined. We quantified  
228 acetate, propionate, and butyrate in stool samples collected from patients who  
229 received care at Stanford Hospital in 2015. These stool samples were from  
230 patients with symptomatic CDI (diarrhea and positive for CDI (via Cepheid Xpert

231 *C. difficile*) and patients without CDI (negative for CDI (via Cepheid Xpert *C.*  
232 *difficile*)). In stool from the symptomatic *C. difficile* patients, we observed  
233 significantly lower concentrations of butyrate (but not acetate or propionate)  
234 relative to patients without CDI (**Figure 4**), which demonstrates that our findings  
235 in mice (**Figure 3B**) are generalizable to humans with CDI. Though acetate,  
236 propionate, and butyrate were previously shown to negatively impact the fitness  
237 of *C. difficile* and other bacterial pathogens [8,40], our observations from mice  
238 and humans provide the rationale for focused and specific investigation of  
239 butyrate.

240

#### 241 ***Butyrate negatively impacts growth in diverse C. difficile isolates***

242 Our previous work showing that butyrate impacts *C. difficile* growth was  
243 restricted to the commonly studied *C. difficile* 630 strain [8] and **Figures 1-3**).  
244 Though similar butyrate-dependent effects were observed in 4 unsequenced *C.*  
245 *difficile* isolates [18], we sought to further situate these findings in the context of a  
246 phylogenetically diverse sample of *C. difficile* strains. We grew 13 different *C.*  
247 *difficile* isolates with representatives from 10 ribotypes (including *C. difficile* 630;  
248 **Table 1**) in pure culture in the presence of 0, 6.25, 12.5, 25, and 50mM sodium  
249 butyrate and in matched concentrations of sodium chloride. For all *C. difficile*  
250 strains tested, butyrate negatively impacts growth kinetics (**Figure S2**), with  
251 notable concentration-dependent differences in maximum growth rate (**Figure**  
252 **5A**) and lag time (**Figure 5B**). All strains tested had significantly longer lag times  
253 in the presence of 50mM butyrate compared to 0mM butyrate. Similarly, all but 2

254 strains tested (CD196 and TL178) exhibited significantly reduced maximum  
255 growth rates in the presence of 50mM butyrate compared to 0mM butyrate. The  
256 significance and magnitude of these effects were smaller for intermediate  
257 butyrate concentrations but were concentration-dependent.

258         Though bulk measurements of butyrate in human and mouse samples are  
259 lower than 50 mM (**Figure 2, Figure 3, Figure 4**, and [8,39], concentrations of  
260 butyrate produced by microbiome members in the gut at relevant spatial scales  
261 (e.g., when *C. difficile* is in close proximity to butyrate-producing commensals)  
262 remains unclear but is likely higher than what is observed via bulk  
263 measurements. Regardless, the concentration-dependent effects we observe for  
264 all strains (**Figure 5**) demonstrate that *C. difficile* growth is reliably impacted by  
265 butyrate and suggest that the molecular mechanisms underlying this response  
266 are conserved across diverse *C. difficile* strains.

267

## 268 **DISCUSSION**

269         This work adds to the growing body of literature that demonstrates that  
270 diet impacts CDI in animal models of infection. Specifically, it refines previous  
271 observations about the impacts of MACs on *C. difficile* fitness in the gut by  
272 showing that diets which lead to elevated butyrate production by the microbiome  
273 reduce burdens of *C. difficile* during infection. Taken together, our work and the  
274 work of others shows that inulin, maltodextrin, and xanthan gum are purified  
275 MACs that consistently suppress CDI while FOS, 2'-FL, 6'-SL, and LNnT are  
276 purified MACs that do not suppress CDI (**Figure 3**, [8,9]). Unlike a standard

277 rodent diet that is a complex mixture of MACs [8], we show that a different  
278 complex mixture of MACs (gum arabic) does not suppress *C. difficile* burdens in  
279 mice (**Figure 3**). Importantly, given that our work exclusively used conventionally-  
280 reared Swiss-Webster mice and that differences in microbiome configuration  
281 dictate metabolites used and produced by a given community [41], it is possible  
282 that the MAC sources that did not clear CDI in our model would clear CDI in the  
283 context of a different microbiome or host. As such, future work should consider  
284 the variability of microbiome composition and metabolic outputs when designing  
285 dietary strategies for impacting CDI and other disease states.

286 *C. difficile* burdens are unlikely to be the only parameter impacted by  
287 MACs during infection, which highlights additional directions for future work. For  
288 example, though we observed that FOS does not suppress CDI in mice (**Figure**  
289 **1**), it was previously shown that FOS increases survival time in hamsters infected  
290 with *C. difficile* [10] but the mechanism of this protection was not defined. As  
291 these and other MAC-driven impacts on the host immune system are better  
292 understood, they will likely contribute to the formulation of specific diet-based  
293 strategies to simultaneously bolster the host immune response while reducing  
294 the fitness of *C. difficile*, either through the manipulation of SCFA levels (which  
295 influence inflammation [42] and colonocyte metabolism [43,44] or by directly  
296 impacting the mucosal immune system (e.g., via HMOs which can influence  
297 inflammatory cell populations [45] and positively impact barrier function [46]).  
298 Future diet-based strategies to mitigate CDI will similarly be informed by the

299 growing literature surrounding the impact of other dietary inputs on CDI (see  
300 **Introduction**).

301 Because butyrate levels differentiate mice and humans that have CDI from  
302 those that do not (**Figure 2C, 3B, 4**), continued focus on this SCFA in the context  
303 of CDI will yield important insights into the biology of *C. difficile*, the ecology of  
304 CDI, and future therapeutic approaches. We and others previously showed that  
305 butyrate negatively impacts growth in 5 distinct *C. difficile* strains [8,18] and in the  
306 current study we extend these findings to 12 additional *C. difficile* strains (**Figure**  
307 **5, Table 1**), together demonstrating that these phenotypes are generalizable  
308 across a large sample of *C. difficile* clinical isolates. We recently developed a  
309 conceptual model to unify the seemingly paradoxical observations that growth  
310 and toxin production are differentially impacted by butyrate [35]. Specifically, *C.*  
311 *difficile* infection and proliferation is favored in a dysbiotic (butyrate deficient) gut  
312 environment where there is minimal competition for metabolites (e.g., amino  
313 acids, organic acids, sugars). Under these conditions, *C. difficile* produces no  
314 detectable toxin. However, as the microbiome recovers from dysbiosis, the  
315 availability of metabolites decreases and the concentrations of butyrate  
316 increases, resulting in reduced *C. difficile* fitness. In response to these  
317 conditions, *C. difficile* up-regulates its toxins, which increase inflammation [47],  
318 and presumably helps to re-establish facets of microbiome community function  
319 that allow *C. difficile* to thrive.

320 Future work based on the above conceptual model and the data  
321 presented in the current study will seek to understand the variety of host-by-

322 microbiome-by-diet interactions that influence *C. difficile* fitness in the gut.  
323 Specific foci on the molecular mechanisms and genetic circuitry underlying the  
324 responses of *C. difficile* to butyrate will facilitate a better basic understanding of  
325 *C. difficile* and how it interacts with the host and the gut microbiome. In addition,  
326 continued research on these and other diet-driven effects on CDI are likely to  
327 yield insights that will aid in the development of specific and targeted  
328 manipulation of CDI, either through dietary intervention, therapeutic application of  
329 specific microbes (e.g., probiotics), or delivery of specific metabolites.

330

## 331 **METHODS**

332

### 333 ***Bacterial strains and culture conditions.***

334 Frozen stocks of *C. difficile* strains used in the study (**Table 1**; [48–50] )  
335 were maintained as -80°C stocks in 25% glycerol under anaerobic conditions in  
336 septum-topped vials. *C. difficile* was routinely cultured on CDMN agar, composed  
337 of *C. difficile* agar base (Oxoid) supplemented with 7% defibrinated horse blood  
338 (HemoStat Laboratories), 32 mg/L moxalactam (Santa Cruz Biotechnology), and  
339 12 mg/L norfloxacin (Sigma-Aldrich) in an anaerobic chamber at 37 ° (Coy).

340 After 16-24 hours of growth, a single colony was picked into 5 mL of pre-  
341 reduced reinforced clostridial medium (RCM, Oxoid), modified reinforced  
342 Clostridial medium (mRCM: 10g/L beef extract, 3g/L yeast extract, 10g/L  
343 peptone, 5g/L dextrose, 5g/L sodium chloride, 3g/L sodium acetate, 0.5g/L  
344 cysteine hydrochloride) or PETC medium (ATCC medium 1754) without fructose

345 (PETC-F), and grown anaerobically at 37°C for 16-24 hours. Liquid cultures were  
346 used as inocula for growth curves and for experiments using murine model CDI,  
347 below.

348 For in vitro growth curve experiments examining *C. difficile* fructan  
349 utilization, subcultures were prepared at a 1:200 dilution in pre-reduced PETC-F  
350 minimal medium supplemented with either 5 mg/mL inulin (OraftiHP; Beneo-  
351 Orafti group) or 5 mg/mL FOS (Orafti P95, Beneo-Orafti group) in sterile  
352 polystyrene 96 well tissue culture plates with low evaporation lids (Falcon).  
353 Cultures were grown anaerobically as above in a BioTek Powerwave plate  
354 reader. At 15 minute intervals, the plate was shaken on the 'slow' setting for 1  
355 minute and the optical density (OD<sub>600</sub>) of the cultures was recorded using Gen5  
356 software (version 1.11.5). After 24 hours of growth, culture supernatants were  
357 collected, centrifuged (5 minutes at 2,500 x g), filtered (0.22 µm PVDF filter), and  
358 stored at -20°C for high performance anion exchange chromatography, below.

359 For in vitro growth curve experiments examining *C. difficile* growth in the  
360 presence of butyrate, subcultures were prepared at a 1:200 dilution in pre-  
361 reduced mRCM (RCM lacking starch and agar which reduces clumping artefacts  
362 in OD<sub>600</sub> readings) in sterile polystyrene 96 well tissue culture plates with low  
363 evaporation lids (Falcon). Cultures were grown anaerobically in a BioTek Epoch2  
364 plate reader. At 30-minute intervals the plate was shaken on the 'slow' setting for  
365 1 minute and the OD<sub>600</sub> of the cultures was recorded using Gen5 software  
366 (version 1.11.5).

367



368 ***Murine model of C. difficile infection.***

369 All animal studies were conducted in strict accordance with Stanford  
370 University Institutional Animal Care and Use Committee (IACUC) guidelines.  
371 Murine model CDI was performed on age- and sex- matched conventionally-  
372 reared Swiss-Webster mice (Taconic) between 8 and 17 weeks of age.

373 To reduce colonization resistance against *C. difficile*, mice were given a  
374 single dose of clindamycin by oral gavage (1 mg/mouse; 200  $\mu$ L of a 5 mg/mL  
375 solution) and were infected 24 hours later with 200  $\mu$ L of overnight culture grown  
376 in RCM (approximately  $1.5 \times 10^7$  cfu/mL).

377 Feces were collected from mice directly into microcentrifuge tubes and  
378 immediately placed on ice. To monitor *C. difficile* burdens in feces, 1  $\mu$ L of each  
379 fecal sample was resuspended in PBS to a final volume of 200  $\mu$ L, 10-fold serial  
380 dilutions of fecal slurries (through  $10^{-3}$ -fold) were prepared in sterile polystyrene  
381 96 well tissue culture plates (Falcon). For each sample, two 10  $\mu$ L aliquots of  
382 each dilution (technical replicates) were spread onto CDMN agar supplemented  
383 with erythromycin (100 mg/L, Acros Organics). Erythromycin supplementation  
384 further reduces growth of bacteria from mouse feces and has no impact on *C.*  
385 *difficile* colony counts (data not shown). After 16–24 hours of anaerobic growth at  
386 37°C, colonies were enumerated and technical replicates were averaged to  
387 determine *C. difficile* burdens in feces (limit of detection =  $2 \times 10^4$  cfu/mL feces).  
388 Immediately following euthanasia at 19 days post infection, cecal contents were  
389 removed from mice, weighed, and flash frozen in liquid nitrogen. *C. difficile* was  
390 undetectable in all mice prior to inoculation with CDI.

391

## 392 ***Mouse diets***

393 Mice were fed one of eight custom diets (Bio Serv) ad libitum: (1) a MAC-  
394 deficient control diet containing 68% glucose (w/v), 18% protein (w/v), and 7% fat  
395 (w/v) (MD, Bio-Serv); or diets containing 10% (w/v) of one of the following  
396 ingredients as a sole source of MAC: (2) inulin (Orafti HP; Beneo-Orafti group,  
397 Mannheim, Germany), (3) FOS (Orafti P95, Beneo-Orafti group, Mannheim,  
398 Germany), (4) gum arabic (Nutriloid Gum Arabic FT; TIC Gums, Belcamp,  
399 Maryland), (5) digestion resistant maltodextrin (Fibersol-2; ADM/Matsutani LLC,  
400 Chicago, Illinois), (6) lacto-N-neotetraose (LNnT; Kyowa Hakko, Tokyo, Japan),  
401 (7) 2'-fucosyllactose (2'-FL; Inalco SpA, Milano, Italy), or (8) 6'-sialyllactose (6'-  
402 SL; Inalco SpA, Milano, Italy). HMOs were enzymatically (LNnT) or chemically  
403 synthesized (2'-FL, 6'-SL). For MAC-containing diets, MAC ingredients were  
404 swapped for an equal quantity of glucose.

405

## 406 ***Human subjects/patient enrollment***

407 Human stool samples were collected from patients receiving care at  
408 Stanford Health Care between January 2015 and November 2015 and  
409 participating in an IRB-exempt quality improvement project aimed at  
410 understanding the rates of *C. difficile* transmission in hematopoietic stem cell  
411 transplant patients. Samples are either from the patient's first post-admission  
412 bowel movement or were collected at a frequency no more than once every 7  
413 days post admission. Samples were collected and immediately assayed for *C.*

414 *difficile* TcdB using the Xpert *C. difficile* assay (Cepheid). Patients with unformed,  
415 *C. difficile*+ stools, were considered to have CDI. After this diagnostic procedure,  
416 residual de-identified samples (regardless of CDI status) were stored at 4°C for  
417 no more than 48 hours and frozen at -80°C. Samples were subjected to targeted  
418 metabolomics, where the SCFAs acetate, propionate, and butyrate were  
419 quantified (see **SCFA quantification**, below).

420

#### 421 ***Quantification of FOS-degradation products***

422 To quantify FOS degradation by *C. difficile*, spent and non-inoculated  
423 PETC-F medium supplemented with 5 mg/mL FOS were filtered through 0.22 µm  
424 PVDF filters, dialysed through centrifuge filters (10 kDa MWCO, Millipore) and  
425 diluted with deionized water to bring the concentration of carbohydrate sources to  
426 a concentration of 1 µg/µL except for inulin (10 µg/µL). Samples were subjected  
427 to high performance anion exchange chromatography on a Dionex ICS-5000  
428 system with an AS-AP autosampler and a pulsed amperometric detector, using a  
429 Dionex CarboPak PA1 column (4x250 mm Analytical, Thermo Scientific) with a  
430 corresponding 4x50 mm guard column. The following solvent gradient was used  
431 (A = 100 mM NaOH, B = 100 mM NaOH 1 M NaOAc): 0 to 60 minutes, 5% to  
432 45% B; 60 to 70 minutes, 45% to 75% B. To prepare the reference  
433 chromatograms shown in **Figure S1**, individual 5 mg/mL solutions of fructose,  
434 glucose, sucrose, kestose, nystose, and FOS were prepared in distilled water,  
435 filtered through 0.22 µm PVDF filters, and subjected to HPAEC-PAD as  
436 described above.

437

438 ***SCFA quantification.***

439 Two methods were used to quantify SCFAs in cecal contents from mice  
440 and in human stool: (1) a GC-MS-based method used in our previous work [8]  
441 and (2) an LC-MS-based method developed to overcome restrictions to access  
442 of core facility equipment during the early stages of the COVID-19 pandemic at  
443 Stanford University.

444 *GC-MS-based SCFA quantification.* Cecal contents from mice or human  
445 stool (70-150 mg) were suspended in a final volume of 600  $\mu$ L in ice-cold ultra-  
446 pure water and blended with a pellet pestle (Kimble Chase) on ice. The slurry  
447 was centrifuged at  $2,350 \times g$  for 30 seconds at  $4^{\circ}\text{C}$  and 250  $\mu$ L of the  
448 supernatant was removed to a septum-topped glass vial and acidified with 20  $\mu$ L  
449 HPLC grade 37% HCl (Sigma Aldrich). Diethyl ether (500  $\mu$ L) was added to the  
450 acidified cecal supernatant to extract SCFAs. Samples were then vortexed at  $4^{\circ}\text{C}$   
451 for 20 minutes on 'high' and then were centrifuged at  $1,000 \times g$  for 3 minutes.  
452 The organic phase was removed into a fresh septum-topped vial and placed on  
453 ice. Then, a second extraction was performed with diethyl ether as above. The  
454 first and second extractions were combined for each sample and 250  $\mu$ L of this  
455 combined solution was added to a 300  $\mu$ L glass insert in a fresh glass septum-  
456 topped vial containing and the SCFAs were derivatized using 25  $\mu$ L N-tert-  
457 butyldimethylsilyl-N-methyltrifluoroacetamide (MTBSTFA; Sigma Aldrich) at  $60^{\circ}\text{C}$   
458 for 30 minutes.

459 Analyses were carried out using an Agilent 7890/5975 single quadrupole  
460 GC/MS. Using a 7683B autosampler, 1  $\mu$ L split injections (1:100) were made  
461 onto a DB-5MSUI capillary column (30 m length, 0.25 mm ID, 0.25  $\mu$ m film  
462 thickness; Agilent) using helium as the carrier gas (1 mL/minute, constant flow  
463 mode). Inlet temperature was 200°C and transfer line temperature was 300°C.  
464 GC temperature was held at 60°C for 2 minutes, ramped at 40°C/min to 160°C,  
465 then ramped at 80°/min to 320°C and held for 2 minutes; total run time was 8.5  
466 minutes. The mass spectrometer used electron ionization (70eV) and scan range  
467 was m/z 50–400, with a 3.75-minute solvent delay. Acetate, propionate, and  
468 butyrate standards (20 mM, 2 mM, 0.2 mM, 0.02 mM, 0 mM) were acidified,  
469 extracted, and derivatized as above, were included in each run, and were used to  
470 generate standard curves to enable SCFA quantification.

471 *LC-MS-based SCFA quantification.* The LC-MS-based SCFA  
472 quantification method was adapted from [51]. Briefly, cecal contents from mice  
473 (50 to 150 mg) were weighed on an analytical balance and diluted in extraction  
474 buffer containing: 80% HPLC-grade water (Fisher), 20% HPLC-grade acetonitrile  
475 (ACN; Fisher) and labelled isotopes of each SCFA measured (2.5  $\mu$ M d3-acetic  
476 acid (Sigma Aldrich), 1  $\mu$ M propionic-3,3,3-d3 acid (CDN Isotopes), 0.5  $\mu$ M  
477 butyric-4,4,4-d3 acid (CDN Isotopes)). The volume of extraction buffer in  
478 microliters was 4X the mass of cecal contents in milligrams for each sample.  
479 Acid-washed beads (150 $\mu$ M-212 $\mu$ M; SigmaAldrich G1145-10G) were added to  
480 the samples and the samples were shaken at 30 Hz for 10 minutes to  
481 homogenize and extract the metabolites. The samples were then incubated at -

482 20°C for 1 hour and subsequently centrifuged at 4°C for 5 minutes at 12,000 rcf.  
483 40 uL of the supernatant was transferred to a 96 well plate to which 20 uL of  
484 200mM 3-nitrophenylhydrazine hydrochloride (Sigma Aldrich; dissolved in 50%  
485 ACN and 50% water) and 20 uL of 120 mM 1-ethyl-3-(3-  
486 dimethylaminopropyl)carbodiimide hydrochloride (Pierce; dissolved in 47% ACN,  
487 47% water and 6% HPLC-grade pyridine (Sigma Aldrich)) were added. The plate  
488 was then sealed and shaken in an incubator at 37°C for 30 minutes. After 30  
489 minutes the plate was cooled to 4°C and 20 uL of the reaction volume was  
490 transferred to 980 µL of a 90:10 (v/v) Water:ACN solution.

491 Analyses were carried out using an Agilent 6470 triple quadrupole LC/MS.  
492 Using a G7167B multisampler, 10uL injections were made onto an Acquity UPLC  
493 BEH C18 column (100 mm length, 2.1 mm inner diameter, 130 Å pore size, 1.7  
494 um particle size; Waters) using water:formic acid (100:0.01, v/v; solvent A) and  
495 acetonitrile:formic acid (100:0.01, v/v; solvent B) as the mobile phase for gradient  
496 elution. The column flow rate was 0.35 mL/min; the column temperature was  
497 40°C, and the autosampler was kept at 5°C. The binary solvent elution gradient  
498 was optimized at 15% B for 2 min, 15%–55% B in 9 min, and then held at 100%  
499 B for 1 min. The column was equilibrated for 3 min at 15% B between injections.  
500 The drying gas (N<sub>2</sub>) temperature was set to 300°C with a flow rate of 12 L/min.  
501 The sheath gas temperature was also set to 300°C with a flow rate of 12 L/min.  
502 The nebulizer gas was set to 25 PSI and the capillary voltage was set to 4200 V.

503 Quantification of analytes was done by standard isotope dilution protocols.  
504 In brief, serial dilutions of a 3 SCFA standard solution (10 mM, 1 mM, 0.1 mM,

505 0.01 mM, 0.001 mM, and 0 mM) were derivatized as above and included in each  
506 run to verify sample concentrations were within linear ranges. For samples within  
507 linear range, analyte concentration was calculated as the product of the paired  
508 internal standard concentration and the ratio of analyte peak area to internal  
509 standard peak area. A single product ion was used for each analyte, no  
510 secondary or qualifier ions were used. To ensure the highest signal-to-noise  
511 ratio, the following steps were taken. First, to ensure that the predicted singly  
512 derivatized species was the dominant precursor ion, full-mass Q1 scans were  
513 performed over the m/z range 100 to 300. Second, collision energies and  
514 fragmentor voltage were optimized using Agilent's MassHunter Optimizer  
515 program with direct infusion of the derivatives from individual standard solutions  
516 containing 50mM of each fatty acid. Optimizer was set to search collision  
517 energies from -10V to -120V in 10V increments and select the two most intense  
518 product ions for optimization. Fragmentor voltage had minimal impact and was  
519 manually set to 75 V.

520

521 ***Measurement of maximum growth rate and lag time for in vitro growth***  
522 ***experiments.***

523 Raw OD<sub>600</sub> measurements of cultures grown in mRCM (see 'Bacterial strains and  
524 culture conditions', above) were exported from Gen5 and analyzed using the  
525 growth\_curve\_statistics.py script (see **Code Availability**, below). Growth rates  
526 were determined for each culture by calculating the derivative of natural log-  
527 transformed OD<sub>600</sub> measurements over time. Growth rate values at each time

528 point were then smoothed using a moving average over 150-min intervals to  
529 minimize artefacts due to noise in OD measurement data, and these smooth  
530 growth rate values were used to determine the maximum growth rate for each  
531 culture. To mitigate any remaining issues with noise in growth rate values, all  
532 growth rate curves were also inspected manually. Specifically, in cases where  
533 the `growth_curve_statistics.py` script selected an artefactual maximum growth  
534 rate, the largest local maximum that did not correspond to noise was manually  
535 assigned as the maximum growth rate. Additionally, lag time was calculated as  
536 half the time to reach the maximum growth rate.

537

#### 538 ***Code availability***

539 Python script that was used to compute maximum growth rate and lag time from  
540 growth curve data is freely available at

541 [https://github.com/HryckowianLab/Pensinger\\_2022](https://github.com/HryckowianLab/Pensinger_2022).

542

#### 543 ***Statistical analysis***

544 Statistical analysis was performed using Graphpad Prism 9.1.0. Details of  
545 specific analyses, including statistical tests used, are found in applicable figure  
546 legends. \* =  $p < 0.05$ , \*\* =  $p < 0.005$ , \*\*\* =  $p < 0.0005$ , \*\*\*\* =  $p < 0.0001$ .

547

#### 548 ***Acknowledgments***

549 We thank Keith Garleb (Abbott) for helpful comments and Niaz Banaei (Stanford  
550 University) for logistical assistance with human stool samples. This work was



551 funded by Abbott (ZB40) and by grants from the following sources: NIH NIDDK  
552 (R01-DK085025 to JLS), NIH DCI (R01-CA200423 to CRB) an NIH postdoctoral  
553 NRSA (5T32AI007328 to AJH), a Stanford University School of Medicine Dean's  
554 Postdoctoral Fellowship (AJH), a Feodor Lynen Postdoctoral Fellowship by the  
555 Alexander von Humboldt Foundation (BS), NSF Graduate Research Fellowships  
556 (WVT, CM), Howard Hughes Medical Institute (CRB), and startup funding from  
557 the University of Wisconsin-Madison (AJH). JLS received an Investigators in the  
558 Pathogenesis of Infectious Disease Award from the Burroughs Wellcome Fund  
559 and is a Chan Zuckerberg Biohub Investigator.

560

#### 561 ***Author Contributions***

562 AJH, ATF, HAD, WVT, MMC, JOG, SKH, and BS performed experiments. AJH,  
563 ATF, HAD, MMC, WVT, JOG, CM, and DAP analyzed the data. DAP, AJH, HAD,  
564 JOG, and BS prepared the display items. EVR, CRB, JC, VA, RHB, LST, and  
565 JLS provided key insights, tools, and reagents. DAP and AJH wrote the paper.  
566 All authors edited the manuscript prior to submission.

567

#### 568 ***Declaration of Interests***

569 This work was funded in part by Abbott. This funder contributed to the design of  
570 the experiments shown in **Figure 3**.

571

#### 572 **REFERENCES**

573 1. Centers for Disease Control and. Antibiotic resistance threats in the United

- 574 States. US Dep Heal Hum Serv. 2019; 1–113. doi:10.15620/cdc:82532
- 575 2. Khanna S, Pardi DS, Aronson SL, Kammer PP, Orenstein R, St Sauver JL,  
576 et al. The epidemiology of community-acquired *Clostridium difficile*  
577 infection: a population-based study. *Am J Gastroenterol*. *Am J*  
578 *Gastroenterol*; 2012;107: 89–95. doi:10.1038/AJG.2011.398  
579 PMID:22108454
- 580 3. David LA, Maurice CF, Carmody RN, Gootenberg DB, Button JE, Wolfe  
581 BE, et al. Diet rapidly and reproducibly alters the human gut microbiome.  
582 *Nature*. *Nature*; 2014;505: 559–563. doi:10.1038/NATURE12820  
583 PMID:24336217
- 584 4. Wastyk HC, Fragiadakis GK, Perelman D, Dahan D, Merrill BD, Yu FB, et  
585 al. Gut-microbiota-targeted diets modulate human immune status. *Cell*.  
586 *Cell*; 2021;184: 4137-4153.e14. doi:10.1016/J.CELL.2021.06.019  
587 PMID:34256014
- 588 5. Mefferd CC, Bhute SS, Phan JR, Villarama J V., Do DM, Alarcia S, et al. A  
589 High-Fat/High-Protein, Atkins-Type Diet Exacerbates *Clostridioides* (  
590 *Clostridium* ) *difficile* Infection in Mice, whereas a High-Carbohydrate Diet  
591 Protects . *mSystems*. American Society for Microbiology; 2020;5.  
592 doi:10.1128/MSYSTEMS.00765-19/SUPPL\_FILE/MSYSTEMS.00765-19-  
593 ST004.EPS
- 594 6. Moore JH, Pinheiro CCD, Zaenker EI, Bolick DT, Kolling GL, Van Opstal E,  
595 et al. Defined Nutrient Diets Alter Susceptibility to *Clostridium difficile*  
596 Associated Disease in a Murine Model. *PLoS One*. *PLoS One*; 2015;10.

- 597 doi:10.1371/JOURNAL.PONE.0131829 PMID:26181795
- 598 7. Battaglioli EJ, Hale VL, Chen J, Jeraldo P, Ruiz-Mojica C, Schmidt BA, et  
599 al. Clostridioides difficile uses amino acids associated with gut microbial  
600 dysbiosis in a subset of patients with diarrhea. Sci Transl Med. Sci Transl  
601 Med; 2018;10. doi:10.1126/SCITRANSLMED.AAM7019 PMID:30355801
- 602 8. Hryckowian AJ, Van Treuren W, Smits SA, Davis NM, Gardner JO, Bouley  
603 DM, et al. Microbiota-accessible carbohydrates suppress Clostridium  
604 difficile infection in a murine model. Nat Microbiol. Nat Microbiol; 2018;3:  
605 662–669. doi:10.1038/S41564-018-0150-6 PMID:29686297
- 606 9. Schnizlein MK, Vendrov KC, Edwards SJ, Martens EC, Young VB. Dietary  
607 Xanthan Gum Alters Antibiotic Efficacy against the Murine Gut Microbiota  
608 and Attenuates Clostridioides difficile Colonization. mSphere. mSphere;  
609 2020;5. doi:10.1128/MSPHERE.00708-19 PMID:31915217
- 610 10. WOLF BW, MEULBROEK JA, JARVIS KP, WHEELER KB, GARLEB KA.  
611 Dietary Supplementation with Fructooligosaccharides Increase Survival  
612 Time in a Hamster Model of Clostridium difficile-Colitis. Biosci Microflora.  
613 JAPAN BIFIDUS FOUNDATION; 1997;16: 59–64.  
614 doi:10.12938/BIFIDUS1996.16.59
- 615 11. Collins J, Robinson C, Danhof H, Knetsch CW, Van Leeuwen HC, Lawley  
616 TD, et al. Dietary trehalose enhances virulence of epidemic Clostridium  
617 difficile. Nature. Nature; 2018;553: 291–294. doi:10.1038/NATURE25178  
618 PMID:29310122
- 619 12. Eyre DW, Didelot X, Buckley AM, Freeman J, Moura IB, Crook DW, et al.

- 620 Clostridium difficile trehalose metabolism variants are common and not  
621 associated with adverse patient outcomes when variably present in the  
622 same lineage. EBioMedicine. Elsevier; 2019;43: 347.  
623 doi:10.1016/J.EBIOM.2019.04.038 PMID:31036529
- 624 13. Zackular JP, Moore JL, Jordan AT, Juttukonda LJ, Noto MJ, Nicholson MR,  
625 et al. Dietary zinc alters the microbiota and decreases resistance to  
626 Clostridium difficile infection. Nat Med. Nat Med; 2016;22: 1330–1334.  
627 doi:10.1038/NM.4174 PMID:27668938
- 628 14. Rojo D, Gosalbes MJ, Ferrari R, Pérez-Cobas AE, Hernández E, Oltra R,  
629 et al. Clostridium difficile heterogeneously impacts intestinal community  
630 architecture but drives stable metabolome responses. ISME J. ISME J;  
631 2015;9: 2206–2220. doi:10.1038/ISMEJ.2015.32 PMID:25756679
- 632 15. Jenior ML, Leslie JL, Young VB, Schloss PD. Clostridium difficile Colonizes  
633 Alternative Nutrient Niches during Infection across Distinct Murine Gut  
634 Microbiomes. mSystems. American Society for Microbiology; 2017;2.  
635 doi:10.1128/msystems.00063-17
- 636 16. Jenior ML, Leslie JL, Young VB, Schloss PD. Clostridium difficile Alters  
637 the Structure and Metabolism of Distinct Cecal Microbiomes during Initial  
638 Infection To Promote Sustained Colonization . mSphere. American Society  
639 for Microbiology; 2018;3. doi:10.1128/MSPHERE.00261-  
640 18/ASSET/E79A63FC-67B3-4F2D-8059-  
641 10C711481BE6/ASSETS/GRAPHIC/SPH0031825740005.JPEG  
642 PMID:29950381

- 643 17. Macfarlane S, Macfarlane GT. Regulation of short-chain fatty acid  
644 production. *Proc Nutr Soc. Proc Nutr Soc*; 2003;62: 67–72.  
645 doi:10.1079/PNS2002207 PMID:12740060
- 646 18. Kondepudi KK, Ambalam P, Nilsson I, Wadström T, Ljungh Å. Prebiotic-  
647 non-digestible oligosaccharides preference of probiotic bifidobacteria and  
648 antimicrobial activity against *Clostridium difficile*. *Anaerobe. Anaerobe*;  
649 2012;18: 489–497. doi:10.1016/J.ANAEROBE.2012.08.005  
650 PMID:22940065
- 651 19. McDonald JAK, Mullish BH, Pechlivanis A, Liu Z, Brignardello J, Kao D, et  
652 al. Inhibiting Growth of *Clostridioides difficile* by Restoring Valerate,  
653 Produced by the Intestinal Microbiota. *Gastroenterology. Gastroenterology*;  
654 2018;155: 1495-1507.e15. doi:10.1053/J.GASTRO.2018.07.014  
655 PMID:30025704
- 656 20. Bloemen JG, Venema K, van de Poll MC, Olde Damink SW, Buurman WA,  
657 Dejong CH. Short chain fatty acids exchange across the gut and liver in  
658 humans measured at surgery. *Clin Nutr. Clin Nutr*; 2009;28: 657–661.  
659 doi:10.1016/J.CLNU.2009.05.011 PMID:19523724
- 660 21. Morrison DJ, Preston T. Formation of short chain fatty acids by the gut  
661 microbiota and their impact on human metabolism. *Gut Microbes. Gut*  
662 *Microbes*; 2016;7: 189–200. doi:10.1080/19490976.2015.1134082  
663 PMID:26963409
- 664 22. Shimotoyodome A, Meguro S, Hase T, Tokimitsu I, Sakata T. Short chain  
665 fatty acids but not lactate or succinate stimulate mucus release in the rat

- 666 colon. *Comp Biochem Physiol A Mol Integr Physiol. Comp Biochem*  
667 *Physiol A Mol Integr Physiol*; 2000;125: 525–531. doi:10.1016/S1095-  
668 6433(00)00183-5 PMID:10840229
- 669 23. Hatayama H, Iwashita J, Kuwajima A, Abe T. The short chain fatty acid,  
670 butyrate, stimulates MUC2 mucin production in the human colon cancer  
671 cell line, LS174T. *Biochem Biophys Res Commun. Biochem Biophys Res*  
672 *Commun*; 2007;356: 599–603. doi:10.1016/J.BBRC.2007.03.025  
673 PMID:17374366
- 674 24. Usami M, Kishimoto K, Ohata A, Miyoshi M, Aoyama M, Fueda Y, et al.  
675 Butyrate and trichostatin A attenuate nuclear factor kappaB activation and  
676 tumor necrosis factor alpha secretion and increase prostaglandin E2  
677 secretion in human peripheral blood mononuclear cells. *Nutr Res. Nutr*  
678 *Res*; 2008;28: 321–328. doi:10.1016/J.NUTRES.2008.02.012  
679 PMID:19083427
- 680 25. Psichas A, Sleeth ML, Murphy KG, Brooks L, Bewick GA, Hanyaloglu AC,  
681 et al. The short chain fatty acid propionate stimulates GLP-1 and PYY  
682 secretion via free fatty acid receptor 2 in rodents. *Int J Obes (Lond). Int J*  
683 *Obes (Lond)*; 2015;39: 424–429. doi:10.1038/IJO.2014.153  
684 PMID:25109781
- 685 26. Kim MH, Kang SG, Park JH, Yanagisawa M, Kim CH. Short-chain fatty  
686 acids activate GPR41 and GPR43 on intestinal epithelial cells to promote  
687 inflammatory responses in mice. *Gastroenterology. Gastroenterology*;  
688 2013;145. doi:10.1053/J.GASTRO.2013.04.056 PMID:23665276

- 689 27. Cummings JH, Pomare EW, Branch HWJ, Naylor CPE, MacFarlane GT.  
690 Short chain fatty acids in human large intestine, portal, hepatic and venous  
691 blood. *Gut*; 1987;28: 1221–1227. doi:10.1136/GUT.28.10.1221  
692 PMID:3678950
- 693 28. Rolfe RD. Role of volatile fatty acids in colonization resistance to  
694 *Clostridium difficile*. *Infect Immun*. *Infect Immun*; 1984;45: 185–191.  
695 doi:10.1128/IAI.45.1.185-191.1984 PMID:6735467
- 696 29. Theriot CM, Koenigsnecht MJ, Carlson PE, Hatton GE, Nelson AM, Li B,  
697 et al. Antibiotic-induced shifts in the mouse gut microbiome and  
698 metabolome increase susceptibility to *Clostridium difficile* infection. *Nat*  
699 *Commun*. *Nat Commun*; 2014;5. doi:10.1038/NCOMMS4114  
700 PMID:24445449
- 701 30. Ritsema T, Smeekens S. Fructans: beneficial for plants and humans. *Curr*  
702 *Opin Plant Biol*. *Curr Opin Plant Biol*; 2003;6: 223–230.  
703 doi:10.1016/S1369-5266(03)00034-7 PMID:12753971
- 704 31. Nakamura S, Nakashio S, Yamakawa K, Tanabe N, Nishida S.  
705 Carbohydrate fermentation by *Clostridium difficile*. *Microbiol Immunol*.  
706 *Microbiol Immunol*; 1982;26: 107–111. doi:10.1111/J.1348-  
707 0421.1982.TB00159.X PMID:6806571
- 708 32. Lammens W, Le Roy K, Schroeven L, Van Laere A, Rabijns A, Van Den  
709 Ende W. Structural insights into glycoside hydrolase family 32 and 68  
710 enzymes: functional implications. *J Exp Bot*. *Oxford Academic*; 2009;60:  
711 727–740. doi:10.1093/JXB/ERN333 PMID:19129163

- 712 33. Louis P, Flint HJ. Formation of propionate and butyrate by the human  
713 colonic microbiota. *Environ Microbiol. Environ Microbiol*; 2017;19: 29–41.  
714 doi:10.1111/1462-2920.13589 PMID:27928878
- 715 34. Ríos-Covián D, Ruas-Madiedo P, Margolles A, Gueimonde M, De los  
716 Reyes-Gavilán CG, Salazar N. Intestinal Short Chain Fatty Acids and their  
717 Link with Diet and Human Health. *Front Microbiol. Front Microbiol*; 2016;7.  
718 doi:10.3389/FMICB.2016.00185 PMID:26925050
- 719 35. Gregory AL, Pensinger DA, Hryckowian AJ. A short chain fatty acid–centric  
720 view of *Clostridioides difficile* pathogenesis. *PLOS Pathog. Public Library*  
721 *of Science*; 2021;17: e1009959. doi:10.1371/JOURNAL.PPAT.1009959  
722 PMID:34673840
- 723 36. Rossi M, Corradini C, Amaretti A, Nicolini M, Pompei A, Zanoni S, et al.  
724 Fermentation of fructooligosaccharides and inulin by bifidobacteria: a  
725 comparative study of pure and fecal cultures. *Appl Environ Microbiol. Appl*  
726 *Environ Microbiol*; 2005;71: 6150–6158. doi:10.1128/AEM.71.10.6150-  
727 6158.2005 PMID:16204533
- 728 37. Šuligoj T, Vignsnæs LK, Van den Abbeele P, Apostolou A, Karalis K, Savva  
729 GM, et al. Effects of Human Milk Oligosaccharides on the Adult Gut  
730 Microbiota and Barrier Function. *Nutrients. Nutrients*; 2020;12: 1–21.  
731 doi:10.3390/NU12092808 PMID:32933181
- 732 38. Sprenger N, Tytgat HL, Binia A, Austin S, Singhal A. Biology of human milk  
733 oligosaccharides: from Basic Science to Clinical Evidence. *J Hum Nutr*  
734 *Diet. J Hum Nutr Diet*; 2022; doi:10.1111/JHN.12990 PMID:35040200



- 735 39. Seekatz AM, Theriot CM, Rao K, Chang YM, Freeman AE, Kao JY, et al.  
736 Restoration of short chain fatty acid and bile acid metabolism following  
737 fecal microbiota transplantation in patients with recurrent *Clostridium*  
738 *difficile* infection. *Anaerobe*. *Anaerobe*; 2018;53: 64–73.  
739 doi:10.1016/J.ANAEROBE.2018.04.001 PMID:29654837
- 740 40. Sun Y, O’Riordan MXD. Regulation of bacterial pathogenesis by intestinal  
741 short-chain Fatty acids. *Adv Appl Microbiol*. *Adv Appl Microbiol*; 2013;85:  
742 93–118. doi:10.1016/B978-0-12-407672-3.00003-4 PMID:23942149
- 743 41. Shepherd ES, Deloache WC, Pruss KM, Whitaker WR, Sonnenburg JL. An  
744 exclusive metabolic niche enables strain engraftment in the gut microbiota.  
745 *Nat* 2018 5577705. *Nature Publishing Group*; 2018;557: 434–438.  
746 doi:10.1038/s41586-018-0092-4 PMID:29743671
- 747 42. Vinolo MAR, Rodrigues HG, Nachbar RT, Curi R. Regulation of  
748 inflammation by short chain fatty acids. *Nutrients*. *Nutrients*; 2011;3: 858–  
749 876. doi:10.3390/NU3100858 PMID:22254083
- 750 43. Fachi JL, De J, Felipe S, Passariello L, Dos A, Farias S, et al. Butyrate  
751 Protects Mice from *Clostridium difficile*-Induced Colitis through an HIF-1-  
752 Dependent Mechanism. *Cell Rep*. 2019;27: 750–761.  
753 doi:10.1016/j.celrep.2019.03.054
- 754 44. Litvak Y, Byndloss MX, Bäumlér AJ. Colonocyte metabolism shapes the  
755 gut microbiota. *Science* (80- ). *American Association for the Advancement*  
756 *of Science*; 2018;362. doi:10.1126/SCIENCE.AAT9076/ASSET/3E223686-  
757 1C11-4413-8AA2-

- 758 6A69D3F5F7E0/ASSETS/GRAPHIC/362\_AAT9076\_F3.JPEG
- 759 PMID:30498100
- 760 45. Zhang W, Yan J, Wu L, Yu Y, Ye RD, Zhang Y, et al. In vitro  
761 immunomodulatory effects of human milk oligosaccharides on murine  
762 macrophage RAW264.7 cells. *Carbohydr Polym. Carbohydr Polym*;  
763 2019;207: 230–238. doi:10.1016/J.CARBPOL.2018.11.039  
764 PMID:30600004
- 765 46. Holscher HD, Davis SR, Tappenden KA. Human milk oligosaccharides  
766 influence maturation of human intestinal Caco-2Bbe and HT-29 cell lines. *J*  
767 *Nutr. J Nutr*; 2014;144: 586–591. doi:10.3945/JN.113.189704  
768 PMID:24572036
- 769 47. Koenigsnecht MJ, Theriot CM, Bergin IL, Schumacher CA, Schloss PD,  
770 Young VB. Dynamics and establishment of *Clostridium difficile* infection in  
771 the murine gastrointestinal tract. *Infect Immun. Infect Immun*; 2015;83:  
772 934–941. doi:10.1128/IAI.02768-14 PMID:25534943
- 773 48. Kumar N, Browne HP, Viciani E, Forster SC, Clare S, Harcourt K, et al.  
774 Adaptation of host transmission cycle during *Clostridium difficile* speciation.  
775 *Nat Genet* 2019 519. Nature Publishing Group; 2019;51: 1315–1320.  
776 doi:10.1038/s41588-019-0478-8 PMID:31406348
- 777 49. He M, Sebahia M, Lawley TD, Stabler RA, Dawson LF, Martin MJ, et al.  
778 Evolutionary dynamics of *Clostridium difficile* over short and long time  
779 scales. *Proc Natl Acad Sci U S A. National Academy of Sciences*;  
780 2010;107: 7527–7532.

- 781           doi:10.1073/PNAS.0914322107/SUPPL\_FILE/PNAS.200914322SI.PDF  
782           PMID:20368420
- 783 50.   Sebahia M, Wren BW, Mullany P, Fairweather NF, Minton N, Stabler R, et  
784           al. The multidrug-resistant human pathogen *Clostridium difficile* has a  
785           highly mobile, mosaic genome. *Nat Genet.* *Nat Genet*; 2006;38: 779–786.  
786           doi:10.1038/NG1830 PMID:16804543
- 787 51.   Han J, Lin K, Sequeira C, Borchers CH. An isotope-labeled chemical  
788           derivatization method for the quantitation of short-chain fatty acids in  
789           human feces by liquid chromatography-tandem mass spectrometry. *Anal*  
790           *Chim Acta.* *Anal Chim Acta*; 2015;854: 86–94.  
791           doi:10.1016/J.ACA.2014.11.015 PMID:25479871

792

### 793 **Figure Legends**

794 **Figure 1. A diet containing inulin, but not FOS, as the sole MAC source**  
795 **reduces *C. difficile* 630 colonization below detection.** Mice were fed a MAC-  
796 deficient (MD) diet or diets containing inulin or FOS as the sole MAC source and  
797 were subjected to murine model CDI. Burdens of *C. difficile* in mouse feces were  
798 quantified until 19 days post infection and are shown as blue circles for mice fed  
799 the MD diet, purple triangles for mice fed the FOS-containing diet, and red  
800 squares for the inulin-containing diet. The geometric mean of *C. difficile* burdens  
801 for mice fed each diet are connected with lines matching this diet-specific  
802 coloring scheme. The limit of detection of the *C. difficile* quantification assay  
803 (20,000 cfu *C. difficile*/mL feces) is shown as a horizontal dotted black line.

804

805 **Figure 2. Growth of *C. difficile* 630 on FOS in vitro, and differential impacts**  
806 **of FOS and inulin on SCFA production by the microbiome in *C. difficile* 630-**  
807 **infected mice (A) *C. difficile* 630 was grown in PETC-F minimal medium (MM,**  
808 **black lines), MM+FOS (purple lines), and MM+Inulin, red lines (n=5 biological**  
809 **replicates per strain) for 24 hours and culture density (OD<sub>600</sub>) was monitored**  
810 **(left). Lines and error bars represent mean OD<sub>600</sub> readings and standard**  
811 **deviation at each time point, respectively. Statistically significant differences**  
812 **between the final OD<sub>600</sub> of these cultures was determined by Mann-Whitney test**  
813 **(right). (B) Filtered supernatants from these cultures were analyzed using high**  
814 **performance anion exchange chromatography and a pulsed amphoteric detector**  
815 **(HPAEC-PAD). Representative chromatograms are shown for uninoculated**  
816 **media (left, green) and for spent media (right, purple). See **Figure S1** for a**  
817 **reference chromatogram, demonstrating that the metabolites depleted by *C.***  
818 ***difficile* are monosaccharides that contaminate the FOS preparation rather than**  
819 **FOS itself. (C) The SCFAs acetate, propionate, and butyrate were quantified in**  
820 **the cecal contents of mice described in **Figure 1**, collected after euthanasia at 19**  
821 **days post-infection. Individual data points represent SCFA concentrations**  
822 **measured via GC-MS and bars represent mean concentration. Blue bars**  
823 **represent SCFAs quantified in mice fed the MAC deficient diet, purple bars**  
824 **represent SCFAs quantified in mice fed the FOS-containing diet, and red bars**  
825 **represent SCFAs quantified in mice fed the inulin-containing diet. Statistical**

826 significance was determined by one-way ANOVA with Tukey's multiple  
827 comparison test. See also **Figure S1**.

828

829 **Figure 3. Differential impacts of MACs on *C. difficile* burdens and an**  
830 **association of *C. difficile* 630 clearance with cecal butyrate concentrations**  
831 **in mice.** (A) Burdens of *C. difficile* in mouse feces were quantified until 19 days  
832 post infection and are shown as light blue crosses for mice fed the gum arabic  
833 diet, red squares for the inulin-containing diet, light green upward triangles for the  
834 resistant maltodextrin diet, orange downward triangles for the 6'-SL diet,  
835 magenta diamonds for the 2'-FL diet, and black circles for the LNnT diet. The  
836 geometric means of *C. difficile* burdens for mice fed each diet are connected with  
837 lines matching this diet-specific coloring scheme. The limit of detection is  
838 displayed as a dotted line. (B) The SCFAs acetate, propionate, and butyrate  
839 were quantified in cecal contents collected from mice after euthanasia at 19 days  
840 post infection via LC/MS. Individual measurements are shown as circles,  
841 squares, and triangles (acetate, propionate, and butyrate, respectively) and are  
842 stratified by mice that had detectable *C. difficile* in their feces versus those that  
843 had undetectable *C. difficile* in their feces. Means are displayed as bars and  
844 statistical significance was assessed by Mann-Whitney test.

845

846 **Figure 4. Fecal butyrate concentrations differentiate humans with CDI from**  
847 **healthy controls.** The SCFAs acetate, propionate, and butyrate were quantified  
848 in human stool samples from patients with symptomatic CDI and from healthy

849 controls via GC-MS (see **Human subjects/patient enrollment**). Means are  
850 displayed as bars and statistically significant differences in SCFA concentrations  
851 between each patient population was determined by Mann-Whitney test.

852

853 **Figure 5. Butyrate negatively impacts growth in diverse *C. difficile* strains.**

854 Thirteen *C. difficile* strains (see **Table 1**) were grown anaerobically in mRCM  
855 supplemented either with 0, 6.25, 12.5, 25, or 50mM sodium butyrate or matched  
856 concentrations of sodium chloride (NaCl) for 24 hours. Culture density (OD<sub>600</sub>)  
857 was monitored throughout this time course (n=6 replicates per growth condition  
858 per strain). For all cultures (A) maximum growth rate and (B) lag time were  
859 calculated. All strains tested had significantly longer lag times in the presence of  
860 50mM butyrate compared to 0mM butyrate. Similarly, all but 2 strains tested  
861 (CD196 and TL178) exhibited significantly reduced maximum growth rates in the  
862 presence of 50mM butyrate compared to 0mM butyrate. Median line is displayed  
863 and statistically significant differences between relevant groups were determined  
864 by Mann-Whitney test. **Figure S2** shows representative growth curves for all 13  
865 strains under the growth conditions tested.

866

867 **Table 1. Bacterial strains used in this study.** Related to **Figures 1, 2, 3, and**  
868 **5.**

869

870 **Figure S1. HPAEC-PAD Chromatograms.** Reference chromatograms for  
871 fructose (light blue), glucose (orange), sucrose (gray), kestose (yellow), nystose

872 (blue), and FOS (green) are shown. Chromatograms for FOS-supplemented  
873 PETC-F minimal medium (FOS + MM; dark blue) and spent PETC-F minimal  
874 medium (FOS + MM spent; peach) are also shown and duplicated from **Figure**  
875 **2B**. Related to **Figure 2**.

876

877 **Figure S2. Representative growth curves of thirteen *C. difficile* strains**  
878 **grown in the presence of sodium butyrate and sodium chloride.** The thirteen  
879 *C. difficile* strains listed in **Table 1** were grown anaerobically in mRCM  
880 supplemented with either 0, 6.25, 12.5, 25, or 50mM sodium butyrate or identical  
881 concentrations of NaCl for 24 hours. Each plot shows three representative  
882 growth curves per strain per condition and represents raw culture density (OD<sub>600</sub>)  
883 measurements for each strain tested. Symbols represent mean and standard  
884 deviation of replicates. Related to **Figure 5**.

Figure 4

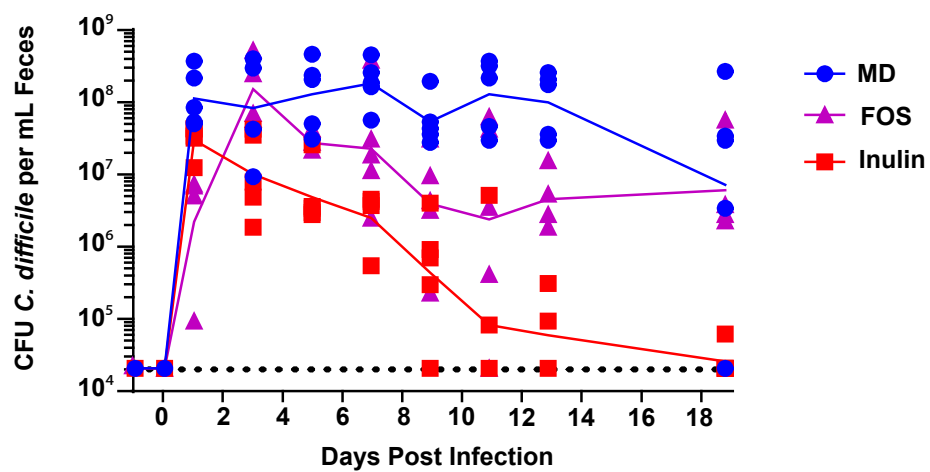



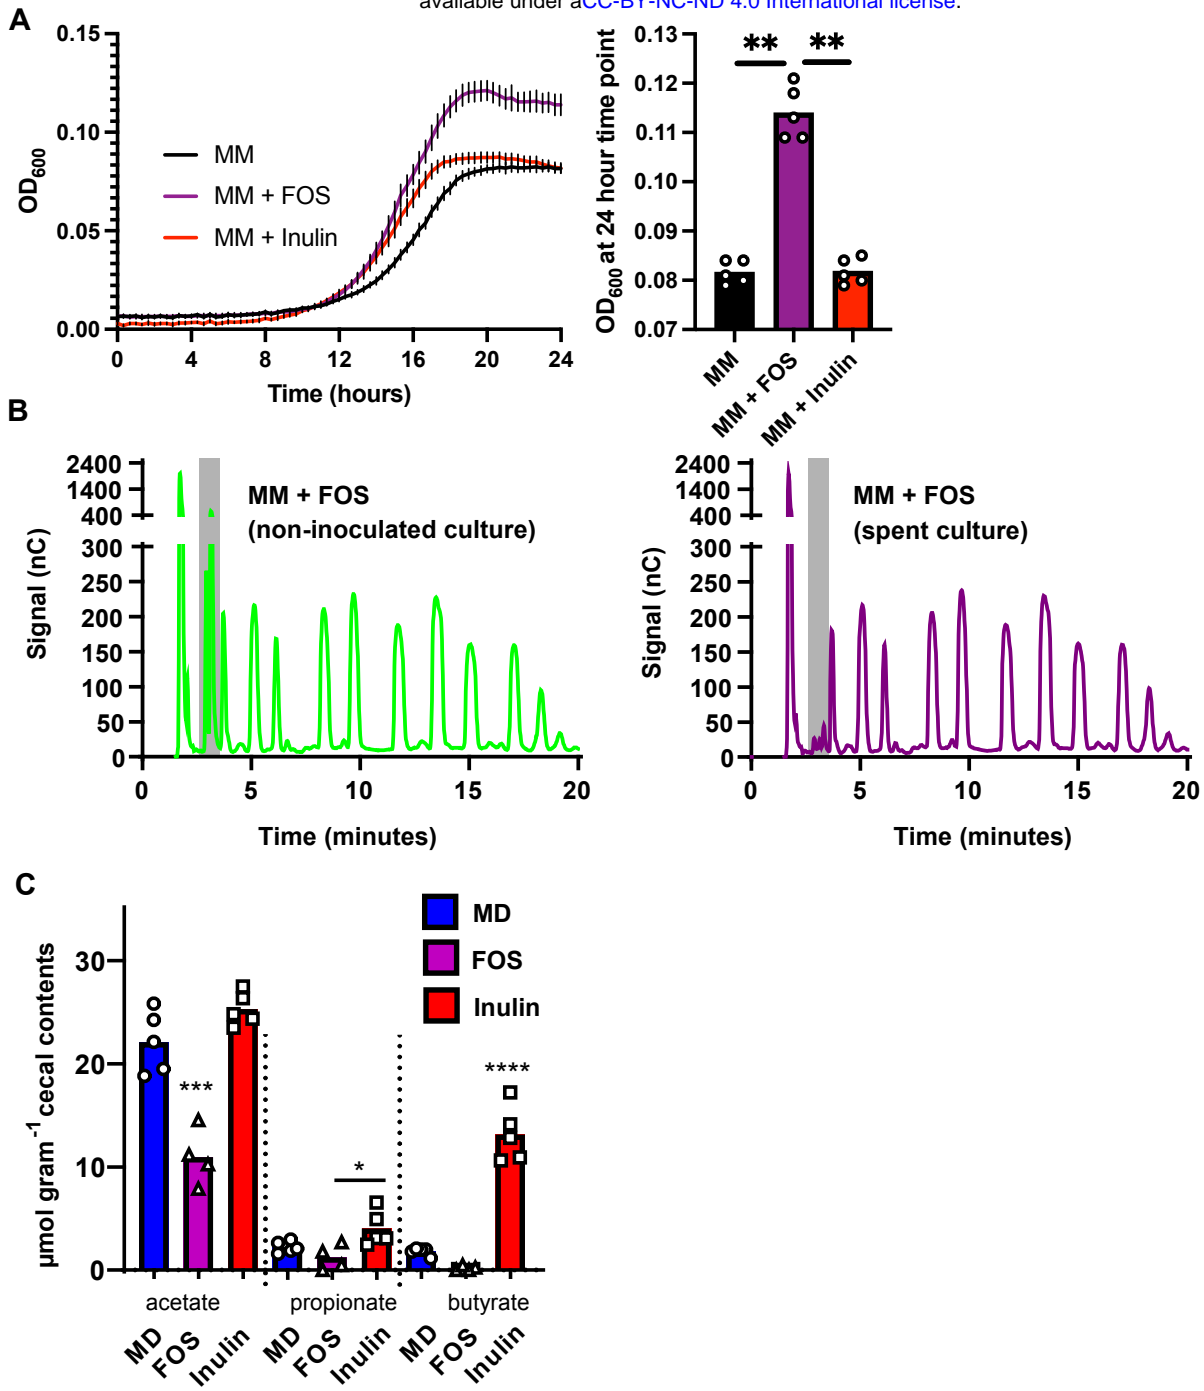

A

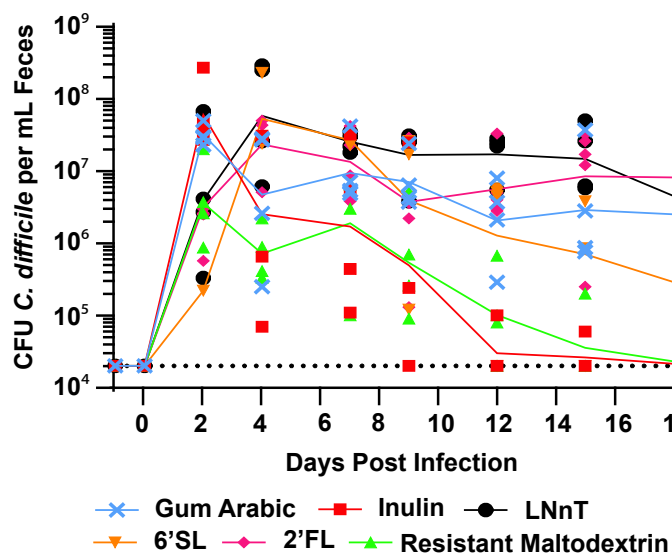

B

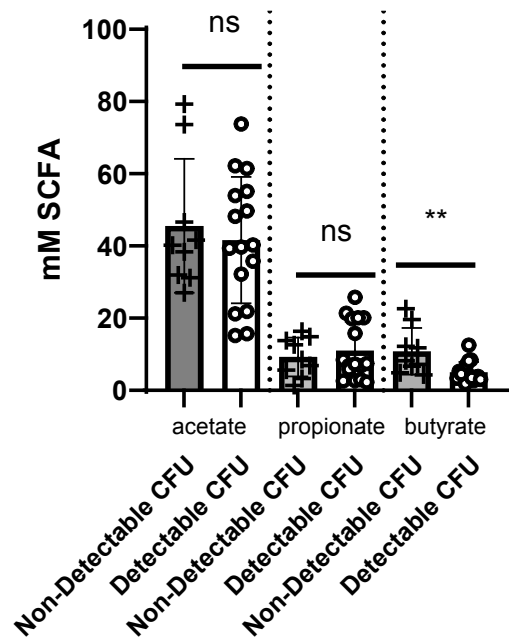

Figure 4

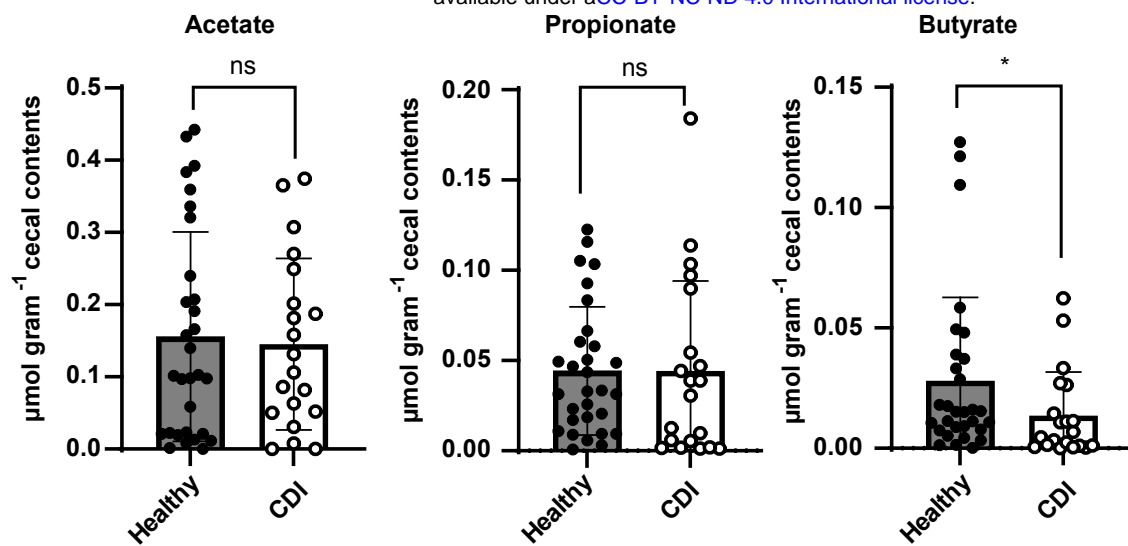



**Table 1: *Clostridioides difficile* strains used in this study**

| <b>Strain</b> | <b>Ribotype</b> | <b>Place/Date of Isolation/Source</b> | <b>Reference</b>                    |
|---------------|-----------------|---------------------------------------|-------------------------------------|
| BI-9          | 1               | Gerding Collection                    | He et al. 2010 PNAS                 |
| Liv024        | 1               | Liverpool/2009/human                  | Kumar et al. 2019 Nature Genetics   |
| TL178         | 2               | Belfast/2009/human                    | Kumar et al. 2019 Nature Genetics   |
| 630           | 12              | Zurich/1982/human                     | Sebahia et al. 2006 Nature Genetics |
| TL176         | 14              | Cambridge, UK/2009/human              | Kumar et al. 2019 Nature Genetics   |
| TL174         | 15              | Cambridge, UK/2009/human              | Kumar et al. 2019 Nature Genetics   |
| CF5           | 17              | Belgium/1995/human                    | He et al. 2010 PNAS                 |
| M68           | 17              | Dublin/2006/human                     | He et al. 2010 PNAS                 |
| CD305         | 23              | London/2008/human                     | Kumar et al. 2019 Nature Genetics   |
| R20291        | 27              | London/2006/human                     | Stabler et al. 2009 Genome Biology  |
| CD196         | 27              | France/1985/human                     | Stabler et al. 2009 Genome Biology  |
| M120          | 78              | UK/2007/human                         | He et al. 2010 PNAS                 |
| Liv022        | 106             | Liverpool/2009/human                  | Kumar et al. 2019 Nature Genetics   |
